# Supplementary material for: Exploring enantioselective recognition of dTMP-Co-bpe coordination polymer for natural amino acids using molecular simulations and circular dichroism
Source: Royal Society of Chemistry journal article supplement (doi:10.1039/d4dt01245c), 2024-01-01
Supplement: d4dt01245c1.pdf [file d4dt01245c1.pdf]

## Exploring Enantioselective Recognition of dTMP-Co-bpe Coordination Polymer for Natural Amino Acids Using Molecular Simulations and Circular Dichroism

### Supporting Information

Hafiz Muhammad Zohaib, <sup>a</sup> Madiha Saqlain, <sup>a</sup> Maroof Ahmad Khan, <sup>b</sup> Sara Masood, <sup>c</sup> Ijaz Gul, <sup>d</sup> Muhammad Irfan, <sup>a,\*</sup> and Hui Li <sup>a,\*</sup>

<sup>a</sup> Key Laboratory of Cluster Science of Ministry of Education, School of Chemistry and Chemical Engineering, Beijing Institute of Technology, Beijing 100081, P. R. China

<sup>b</sup> State Key Laboratory of Marine Resource Utilization in South China Sea, Collaborative Innovation Center of Marine Science and Technology, Hainan University, 570228 Haikou, P. R. China

<sup>c</sup> Department of Chemistry, Quaid-i-Azam University, Islamabad 45320, Pakistan

<sup>d</sup> Institute of Biopharmaceutical and Health Engineering, Tsinghua Shenzhen International Graduate School, Tsinghua University, China.

\*Email: [irfanmuhammad@bit.edu.cn](mailto:irfanmuhammad@bit.edu.cn)

\*Email: [lihui@bit.edu.cn](mailto:lihui@bit.edu.cn)

### Table of Contents

|                                                                                               |    |
|-----------------------------------------------------------------------------------------------|----|
| 1. General Methods.....                                                                       | 2  |
| 1.1. Materials.....                                                                           | 2  |
| 1.2. Instrumentation.....                                                                     | 2  |
| 2. Synthesis and Structural Characterization.....                                             | 3  |
| 3. Crystal Structure Determination and Refinement.....                                        | 4  |
| 4. Crystallographic Data and Structural Information.....                                      | 4  |
| 4.1. Table S1: Crystallographic data for CP-1.....                                            | 4  |
| 4.2. Table S2: Bond length of CP-1. ....                                                      | 6  |
| 4.3. Table S3: Bond angle of CP-1. ....                                                       | 8  |
| 4.4. Table S4: Hydrogen Bonding of CP-1. ....                                                 | 10 |
| 4.5. Table S5: Binding free energy differences of the D/L forms of different amino acids..... | 11 |
| 4.6. Table S6: CD-spectra of dTMP and coordination CP-1 in the solution phase. ....           | 12 |
| 4.7. Table S7: The relative crystalline-state CD spectrum peaks. ....                         | 12 |

|                                                                                                                           |    |
|---------------------------------------------------------------------------------------------------------------------------|----|
| 5. Crystal structure. ....                                                                                                | 13 |
| 5.1. Supporting information of CP-1.....                                                                                  | 13 |
| 5.2. Supporting information of CP-1.....                                                                                  | 14 |
| 6. Molecular simulation for the chiral separation of amino acids.....                                                     | 15 |
| 6.1. Molecular Simulation-based Interactions of CP-1 with <i>D</i> -Phenylalanine <i>and</i> <i>L</i> -Phenylalanine. ... | 16 |
| 6.2. Molecular Simulation-based Interactions of CP-1 with <i>D</i> -Histidine <i>and</i> <i>L</i> -Histidine. ....        | 17 |
| 6.3. The solution CD spectrum of CP-1 with Amino acids. ....                                                              | 18 |
| 7. The PXRD patterns of the CP-1. ....                                                                                    | 19 |
| 8. The UV-Vis absorption spectrums of the ligand and CP-1. ....                                                           | 19 |
| 9. The CD spectra (Solid phase) of the ligand and CP-1.....                                                               | 20 |
| 10. The CD spectra (Solution phase) of the ligand and CP-1. ....                                                          | 20 |
| 11. Infrared Spectra. ....                                                                                                | 21 |
| 12. Thermo–Gravimetric Analysis.....                                                                                      | 21 |
| 13. The CD spectrum and UV-Vis titration of CP-1 with amino acids. ....                                                   | 22 |

## 1. General Methods.

### 1.1. Materials.

Chemical reagents were used as purchased without further purification. Aladdin provided 1,2-di(4-pyridyl) ethene (bpe), while Alfa Aesar supplied  $M(\text{NO}_3)_2 \cdot 6\text{H}_2\text{O}$  ( $M=\text{Co}^{2+}$ ) and 2'-Deoxythymidine-5'-monophosphate, disodium salt. *D*- histidine, *L*-histidine, *D*- phenylalanine, and *L*-phenylalanine were purchased from Macklin.

### 1.2. Instrumentation.

Elemental analysis of the C, H, and N components was performed using an elemental analyzer with plate number 1. KBr pellet FT-IR spectra were obtained in the 4000-400  $\text{cm}^{-1}$  range using a Nicolet Nexus FT-IR spectrometer. A TU-1950 spectrophotometer was used to obtain UV-Vis

spectra. Powder diffraction X-ray studies were conducted using a Bruker D8 Advance X-ray diffractometer. Monochromatized graphite Mo K $\alpha$  radiation with a number 1 was used to capture single crystal X-ray data using a Bruker APEX-II CCD and Rigaku Saturn724+ (2 x 2 bin mode). CD measurements were carried out using a JASCO J-810 spectropolarimeter under a constant nitrogen flow. Thermogravimetric analysis (TGA) was conducted using a DTG-60H thermal analyzer in an atmosphere of nitrogen with a heating rate of 5°C/min from room temperature to 400°C. The pH of the specimen solution was determined using a PHS-3C meter.

## **2. Synthesis and Structural Characterization.**

The method of synthesis of the whole coordination polymer involves the addition of (4 mL) aqueous solution of 2'-Deoxythymidine 5'monophosphate disodium salt in (4 mL) Co (NO<sub>3</sub>)<sub>2</sub>.6H<sub>2</sub>O aqueous solution. Stirring the mixture for 15 minutes, then add the aqueous solution of auxiliary ligand (bpe). HNO<sub>3</sub> (1 M) is used to modify the suspension of acidity till the solution becomes transparent. The desired solution was filtered after stirring the solution around 30–40 min. At room temperature, slow evaporation helped us to obtain an appropriate investigation of single crystal X-ray diffraction. The X-ray powder diffraction pattern of polycrystalline specimens of its CP-1 and ligands was consistent with their theoretical patterns (Figure S7), confirming the bulk specimen phase purity. The CP-1's water content and thermal stability were determined by the analysis of thermo–gravimetric (Figure S12). The Metal Nucleotide's kinds of interactions have been identified by using FT–IR (Figure S11).

### 3. Crystal Structure Determination and Refinement.

The X-ray single crystal data collections for the CP-1 was performed on a diffractometer of Rigaku Saturn724+ (2x2 bin mode), and Bruker APEX-II CCD was used to acquire data of single crystal X-ray with  $M_o K\alpha$  radiation ( $\lambda = 0.71073 \text{ \AA}$ ) monochromatized graphite. The crystal size of the CP-1 is  $0.32 \times 0.21 \times 0.18 \text{ mm}^3$  (1). The crystals were kept at 296(2) K during data collection. Utilizing Olex2, the structure was solved with the XT.3 Structure solution program using Intrinsic Phase formation, and refinement was performed using SHELXL4 and a refinement package that involved Least Squares minimization of whole non-hydrogen atoms in complexes. During refinement, the positions and thermal parameters of hydrogen atoms bound to atoms of carbon, nitrogen, and oxygen were fixed using geometrical calculations. In water molecules, hydrogen atoms are positioned geometrically. A summary of the crystallographic information and experimental data for structural analysis of the CP-1 is provided in Table 1, and a summary of certain angles and bond distances along its standard deviations is provided in Tables S2–S3. The summary of the CP-1 hydrogen bond is in Table S4.

### 4. Crystallographic Data and Structural Information.

#### 4.1. Table S1: Crystallographic data for CP-1.

| Parameters        | CP-1                       |
|-------------------|----------------------------|
| Empirical formula | $C_{22}H_{45}CoN_4O_{20}P$ |
| Formula weight    | 775.52                     |
| Temperature/K     | 298.00                     |

|                                                |                                       |
|------------------------------------------------|---------------------------------------|
| Crystal system                                 | orthorhombic                          |
| Space group                                    | $P2_12_12_1$                          |
| a/Å                                            | 13.6235(16)                           |
| b/Å                                            | 14.122(2)                             |
| c/Å                                            | 17.971(3)                             |
| $\alpha/^\circ$                                | 90                                    |
| $\beta/^\circ$                                 | 90                                    |
| $\gamma/^\circ$                                | 90                                    |
| Volume/Å <sup>3</sup>                          | 3457.3(8)                             |
| Z                                              | 4                                     |
| $\rho_{\text{calc}}/\text{g}/\text{cm}^3$      | 1.490                                 |
| $\mu/\text{mm}^{-1}$                           | 0.628                                 |
| F(000)                                         | 1628.0                                |
| Crystal size/mm <sup>3</sup>                   | 0.32 × 0.21 × 0.18                    |
| Radiation                                      | MoK $\alpha$ ( $\lambda = 0.71073$ )  |
| 2 $\theta$ range for data collection/ $^\circ$ | 4.732 to 49.472                       |
| Index ranges                                   | -16 ≤ h ≤ 14, -16 ≤ k ≤ 16, -21 ≤ l ≤ |

|                                                |                                                                  |
|------------------------------------------------|------------------------------------------------------------------|
|                                                | 21                                                               |
| Reflections collected                          | 25118                                                            |
| Independent reflections                        | 5897 [ $R_{\text{int}} = 0.1004$ , $R_{\text{sigma}} = 0.0829$ ] |
| Data/restraints/parameters                     | 5897/0/466                                                       |
| Goodness-of-fit on $F^2$                       | 1.014                                                            |
| Final R indexes [ $I \geq 2\sigma(I)$ ]        | $R_1 = 0.0432$ , $wR_2 = 0.0830$                                 |
| Final R indexes [all data]                     | $R_1 = 0.0754$ , $wR_2 = 0.0946$                                 |
| Largest diff. peak/hole / $e \text{ \AA}^{-3}$ | 0.41/-0.37                                                       |
| Flack parameter                                | 0.000(12)                                                        |

**4.2. Table S2: Bond length of CP-1.**

| Atom | Atom | Length/ $\text{\AA}$ | Atom | Atom | Length/ $\text{\AA}$ |
|------|------|----------------------|------|------|----------------------|
| Co1  | O1   | 2.061(4)             | N2   | C22  | 1.463(7)             |
| Co1  | O12  | 2.174(4)             | N3   | C8   | 1.341(7)             |
| Co1  | O14  | 2.137(4)             | N3   | C5   | 1.331(7)             |
| Co1  | N1   | 2.126(4)             | C1   | C12  | 1.461(7)             |
| Co1  | O20  | 2.119(4)             | C1   | C7   | 1.380(8)             |

|     |                 |          |     |     |          |
|-----|-----------------|----------|-----|-----|----------|
| Co1 | N3 <sup>1</sup> | 2.150(4) | C1  | C15 | 1.398(8) |
| P1  | O1              | 1.531(4) | C6  | C16 | 1.380(8) |
| P1  | O8              | 1.505(4) | C6  | C13 | 1.458(7) |
| P1  | O10             | 1.522(4) | C6  | C19 | 1.391(8) |
| P1  | O5              | 1.596(4) | C8  | C16 | 1.374(8) |
| O4  | C14             | 1.450(7) | C10 | C22 | 1.501(8) |
| O4  | C22             | 1.415(7) | C10 | C9  | 1.522(8) |
| O6  | C4              | 1.220(6) | C12 | C13 | 1.329(7) |
| O16 | C9              | 1.408(7) | C14 | C17 | 1.504(8) |
| O18 | C2              | 1.243(7) | C14 | C9  | 1.535(8) |
| N1  | C18             | 1.351(7) | C18 | C15 | 1.361(8) |
| N1  | C11             | 1.330(7) | C20 | C3  | 1.344(8) |
| O5  | C17             | 1.432(7) | C11 | C7  | 1.385(7) |
| N4  | C4              | 1.365(8) | C3  | C2  | 1.429(8) |
| N4  | C2              | 1.383(9) | C3  | C21 | 1.492(9) |
| N2  | C4              | 1.379(8) | C19 | C5  | 1.385(8) |
| N2  | C20             | 1.373(8) |     |     |          |

<sup>1</sup>-1+X,+Y,+Z

4.3. Table S3: Bond angle of CP-1.

| Atom            | Atom | Atom            | Angle/°    | Atom | Atom | Atom | Angle/°  |
|-----------------|------|-----------------|------------|------|------|------|----------|
| O1              | Co1  | O12             | 89.95(16)  | C15  | C1   | C12  | 122.8(5) |
| O1              | Co1  | O14             | 98.16(15)  | O6   | C4   | N4   | 123.0(6) |
| O1              | Co1  | N1              | 89.72(16)  | O6   | C4   | N2   | 122.8(6) |
| O1              | Co1  | O20             | 172.45(16) | N4   | C4   | N2   | 114.3(6) |
| O1              | Co1  | N3 <sup>1</sup> | 92.66(17)  | C16  | C6   | C13  | 124.2(5) |
| O14             | Co1  | O12             | 171.70(16) | C16  | C6   | C19  | 116.9(5) |
| O14             | Co1  | N3 <sup>1</sup> | 87.55(17)  | C19  | C6   | C13  | 118.9(5) |
| N1              | Co1  | O12             | 92.83(18)  | N3   | C8   | C16  | 122.9(5) |
| N1              | Co1  | O14             | 88.94(17)  | C22  | C10  | C9   | 102.9(5) |
| N1              | Co1  | N3 <sup>1</sup> | 176.0(2)   | C13  | C12  | C1   | 124.3(5) |
| O20             | Co1  | O12             | 82.80(17)  | O4   | C14  | C17  | 107.9(5) |
| O20             | Co1  | O14             | 89.15(16)  | O4   | C14  | C9   | 106.6(4) |
| O20             | Co1  | N1              | 88.53(16)  | C17  | C14  | C9   | 116.1(5) |
| O20             | Co1  | N3 <sup>1</sup> | 89.51(17)  | C8   | C16  | C6   | 120.3(6) |
| N3 <sup>1</sup> | Co1  | O12             | 90.37(17)  | N1   | C18  | C15  | 123.8(6) |
| O1              | P1   | O5              | 107.1(2)   | C3   | C20  | N2   | 123.7(6) |
| O8              | P1   | O1              | 112.8(2)   | O4   | C22  | N2   | 107.6(5) |
| O8              | P1   | O10             | 113.7(2)   | O4   | C22  | C10  | 104.5(5) |
| O8              | P1   | O5              | 108.7(2)   | N2   | C22  | C10  | 115.1(5) |



|     |    |                  |          |     |     |     |          |
|-----|----|------------------|----------|-----|-----|-----|----------|
| O10 | P1 | O1               | 111.4(2) | N1  | C11 | C7  | 123.6(5) |
| O10 | P1 | O5               | 102.4(2) | C20 | C3  | C2  | 117.2(6) |
| P1  | O1 | Co1              | 135.4(2) | C20 | C3  | C21 | 122.3(6) |
| C22 | O4 | C14              | 108.8(4) | C2  | C3  | C21 | 120.5(6) |
| C18 | N1 | Co1              | 120.4(4) | C12 | C13 | C6  | 126.0(6) |
| C11 | N1 | Co1              | 123.4(4) | C1  | C7  | C11 | 119.9(5) |
| C11 | N1 | C18              | 116.2(5) | C18 | C15 | C1  | 119.9(5) |
| C17 | O5 | P1               | 120.4(3) | O18 | C2  | N4  | 119.3(6) |
| C4  | N4 | C2               | 126.8(6) | O18 | C2  | C3  | 124.3(6) |
| C4  | N2 | C22              | 119.1(5) | N4  | C2  | C3  | 116.4(6) |
| C20 | N2 | C4               | 121.6(5) | O5  | C17 | C14 | 107.1(5) |
| C20 | N2 | C22              | 119.2(5) | O16 | C9  | C10 | 112.8(5) |
| C8  | N3 | Co1 <sup>2</sup> | 120.7(4) | O16 | C9  | C14 | 107.8(5) |
| C5  | N3 | Co1 <sup>2</sup> | 122.1(4) | C10 | C9  | C14 | 102.7(5) |
| C5  | N3 | C8               | 117.2(4) | C5  | C19 | C6  | 119.4(6) |
| C7  | C1 | C12              | 120.6(5) | N3  | C5  | C19 | 123.3(6) |
| C7  | C1 | C15              | 116.6(5) |     |     |     |          |

<sup>1</sup>-1+X,+Y,+Z; <sup>2</sup>1+X,+Y,+Z

#### 4.4. Table S4: Hydrogen Bonding of CP-1.

| D-H      | d(D-H) | d(H...A) | <DHA  | d(D...A) | A   | Symmetry |
|----------|--------|----------|-------|----------|-----|----------|
| O12-H12A | 0.85   | 1.76     | 159.2 | 2.577(5) | O10 |          |

|          |         |         |         |           |     |                            |
|----------|---------|---------|---------|-----------|-----|----------------------------|
| O12-H12B | 0.86    | 2.08    | 141.0   | 2.801(7)  | O13 | [ $1/2+x, 1/2-y, 1-z$ ]    |
| O14-H14A | 0.87    | 2.05    | 143.4   | 2.795(6)  | O7  |                            |
| O14-H14B | 0.87    | 2.06    | 154.1   | 2.867(6)  | O13 | [ $-1/2-x, 1-y, -1/2+z.$ ] |
| O16-H16  | 0.82    | 1.84    | 173.2)  | 2.653(6)  | O8  | [ $-1/2+x, 3/2-y, 1-z$ ]   |
| O20-H20A | 0.86    | 1.90    | 151.9   | 2.688(7)  | O17 |                            |
| O20-H20B | 0.86    | 1.90    | 167.9   | 2.742(7)  | O11 |                            |
| O3-H3A   | 0.85    | 2.04    | 164.2   | 2.866(7)  | O18 | [ $-x, -1/2+y, 3/2-z$ ]    |
| O3-H3B   | 0.85    | 1.91    | 159.4   | 2.724(7)  | O10 |                            |
| O13-H13D | 0.85    | 1.93    | 158.6   | 2.744(10) | O19 |                            |
| O7-H7A   | 0.85    | 2.04    | 166.3   | 2.872(7)  | O6  | [ $1/2+x, 3/2-y, 1-z$ ]    |
| O7-H7B   | 0.85    | 2.03    | 160.9   | 2.843(8)  | O3  |                            |
| O15-H15B | 0.85    | 1.95    | 170.1   | 2.796(7)  | O8  |                            |
| O2-H2A   | 0.85    | 2.06    | 136.0   | 2.740(7)  | O10 | [ $3/2-x, -1/2+y, 1-z$ ]   |
| O17-H17C | 0.85    | 2.19    | 138.2   | 2.880(13) | O9  |                            |
| O17-H17D | 0.85    | 1.99    | 158.4   | 2.801(8)  | O16 | [ $-x, 1/2+y, 1/2-z$ ]     |
| N4-H4    | 0.68(9) | 2.12(9) | 169(11) | 2.793(8)  | O2  | [ $-x, 1/2+y, 3/2-z$ ]     |

<sup>1</sup> $1/2+x, 1/2-y, 1-z$ ; <sup>2</sup> $-1/2-x, 1-y, -1/2+z$ ; <sup>3</sup> $-1/2+x, 3/2-y, 1-z$ ; <sup>4</sup> $-x, -1/2+y, 3/2-z$ ; <sup>5</sup> $1/2+x, 3/2-y, 1-$

$z$ ; <sup>6</sup> $-x, 1/2+y, 1/2-z$ ; <sup>7</sup> $-x, 1/2+y, 3/2-z$

| <b>Amino Acid</b>    | <b>L (<math>\Delta G</math>)</b> | <b>D (<math>\Delta G</math>)</b> | <b>(<math>\Delta\Delta G</math>)</b> |
|----------------------|----------------------------------|----------------------------------|--------------------------------------|
| Alanine              | -4.4551883                       | -4.6472797                       | 0.1920914                            |
| Arginine             | -9.791585                        | -9.9475193                       | 0.1559343                            |
| Asparagine           | -5.1172843                       | -7.3462014                       | 2.2289171                            |
| Aspartate            | -7.294735                        | -6.8797908                       | -0.4149442                           |
| Cysteine             | -5.0861645                       | -6.1769829                       | 1.0908184                            |
| Glutamate            | -9.1023855                       | -9.2617321                       | 0.1593466                            |
| Glutamine            | -6.9063993                       | -9.1156626                       | 2.2092633                            |
| Glycine              | -4.1340561                       | -4.0230340                       | 0.1110221                            |
| <b>Histidine</b>     | <b>-6.3831158</b>                | <b>-9.2605658</b>                | <b>2.87745</b>                       |
| Isoleucine           | -4.3050766                       | -6.5903096                       | 2.285233                             |
| Leucine              | -5.6766372                       | -5.806551                        | 0.1299138                            |
| Lysine               | -11.15537                        | -9.6076288                       | -1.5477412                           |
| Methionine           | -6.8319883                       | -7.340785                        | 0.5087967                            |
| <b>Phenylalanine</b> | <b>-5.2889028</b>                | <b>-9.1893711</b>                | <b>3.9004683</b>                     |
| Proline              | -4.8883934                       | -5.6353655                       | 0.7469721                            |
| Serine               | -4.6347342                       | -5.5890551                       | 0.9543209                            |
| Threonine            | -5.3441644                       | -6.1785383                       | 0.8343739                            |
| Tryptophan           | -6.2097054                       | -7.9882946                       | 1.7785892                            |
| Tyrosine             | -7.4261208                       | -9.532464                        | 2.1063432                            |
| Valine               | -6.4103479                       | -6.445612                        | 0.0352641                            |

**4.5. Table S5: Binding free energy differences of the D/L forms of different amino acids.**

4.6. Table S6: CD-spectra of dTMP and coordination CP-1 in the solution phase.

| Peak (nm) | $\lambda_1$ | $\lambda_2$ | $\lambda_3$ | $\lambda_4$ |
|-----------|-------------|-------------|-------------|-------------|
| dTMP      | 200(+)      | 218(-)      | 233(-)      | 272(+)      |
| CP-1      | -           | 211(-)      | 231(-)      | 274 (+)     |

4.7. Table S7: The relative crystalline-state CD spectrum peaks.

| Peak (nm) | $\lambda_1$ | $\lambda_2$ |
|-----------|-------------|-------------|
| dTMP      | 212 (+)     | 242 (-)     |
| CP-1      | 219 (-)     | 317 (+)     |

## 5. Crystal structure.

### 5.1. Supporting information of CP-1

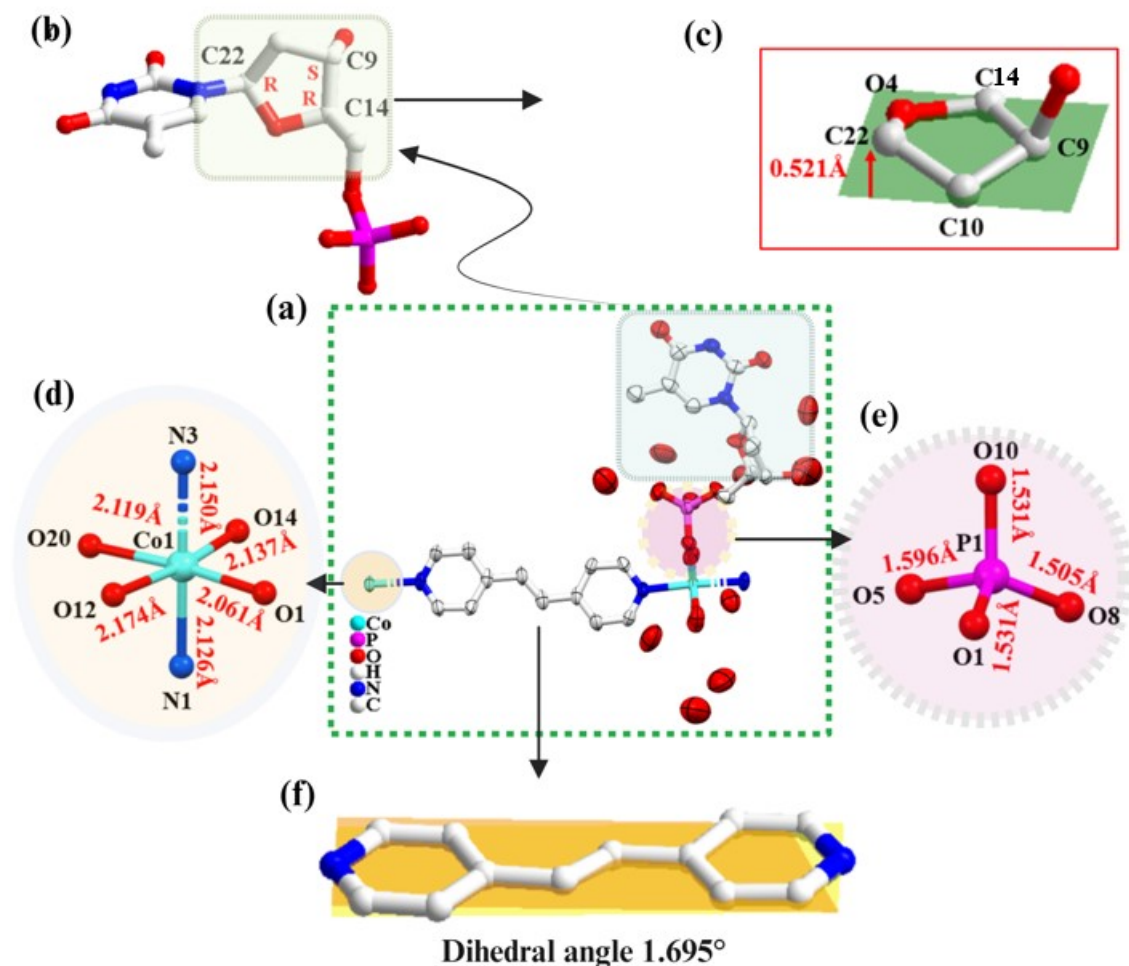

**Figure S1:** (a) CP-1, an asymmetric unit with guest water molecules. The hydrogen atoms are not shown for clarity. (b) dTMP ligands obtained new type configuration such as sugar motif shows the R, S, R configuration. (c)  $C_3'$ - $exo_3E$  conformations of five-membered rings in 1. The green color indicates a perfect (C10–C9–C14–O4) plane while C22 out of the plane is 0.521 Å. (d) Shows the distorted Octahedral geometry, one dTMP occupying the equatorial position and the two bpe on the axial position presenting trans-position. (e) The phosphate group revealed the distorted tetrahedral geometry. (f) Twisting of the bpe ligand presented by the dihedral angle 1.695°.

## 5.2. Supporting information of CP-1

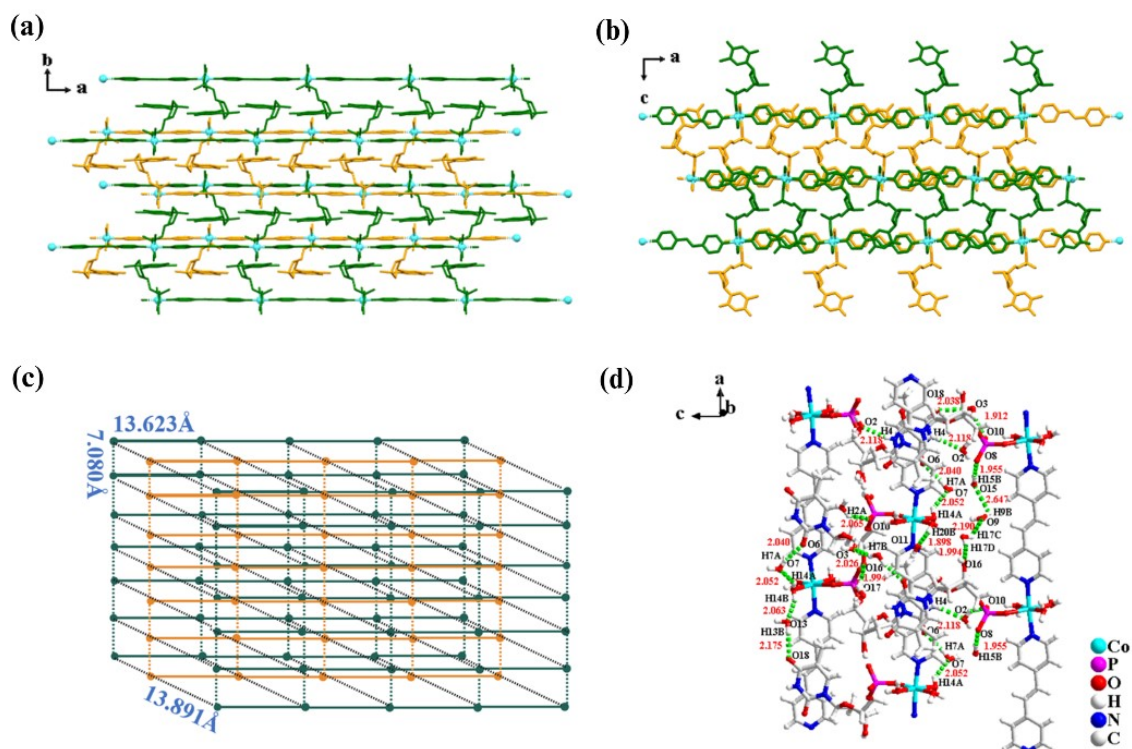

**Figure S2:** (a) Depicts the 2D structure of CP-1 formed by the interaction of nucleobase with bridging ligand along the c-axis. (b) In 3D structure, the green and orange layers are connected via supramolecular interactions between guest water molecules and the oxygen of phosphate and metal-coordinated water molecules. (c) The Topology illustrates Co(II) metal ions are arranged in a 2D manner with a distance of 13.623 Å between two Co metal ions separated by a bpe bridging ligand. The distance between Co atoms in two adjacent layers attached by pi-pi stacking is 7.080 Å. The distance between Co-1...Co-1 separated by bpe ligand in the 3D assembly is 13.891. (d) Hydrogen bonding via guest water molecules converts 2D supramolecular assembly into the 3D framework.

6. Molecular simulation for the chiral separation of amino acids.

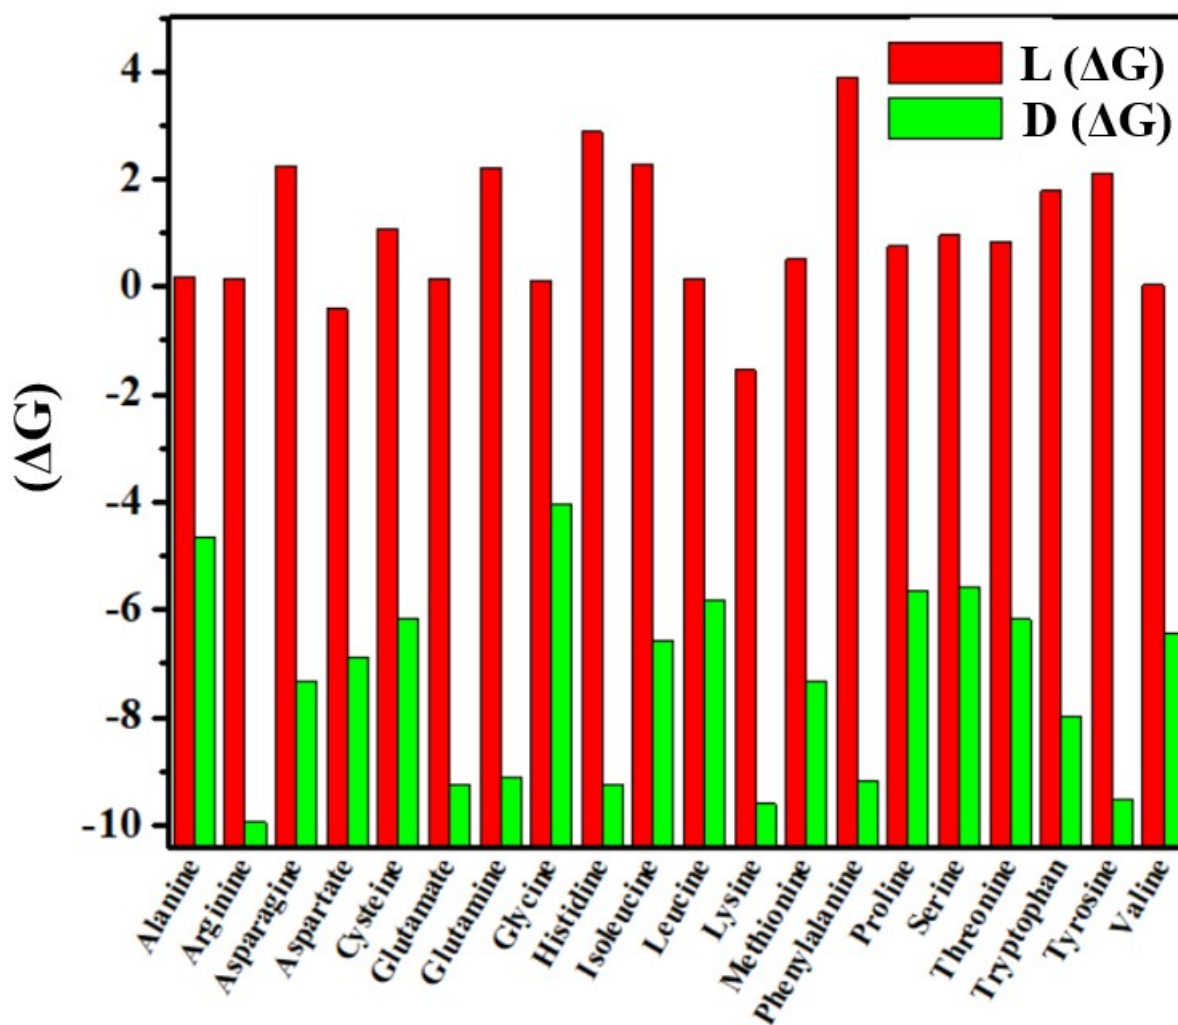

Figure S3: Binding free energy differences of the D/L forms of different amino acids.

6.1. Molecular Simulation-based Interactions of CP-1 with *D*-Phenylalanine and *L*-Phenylalanine.

a) Interaction of CP-1 with *D*-Phenylalanine

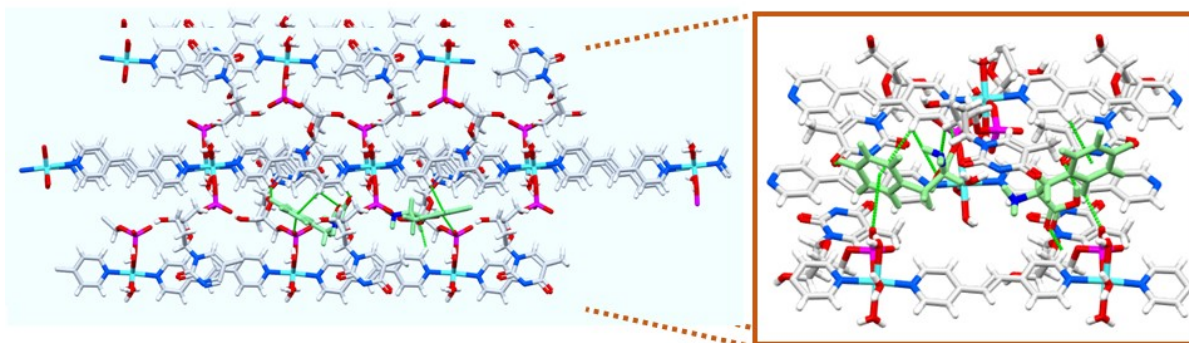

b) Interaction of CP-1 with *L*-Phenylalanine

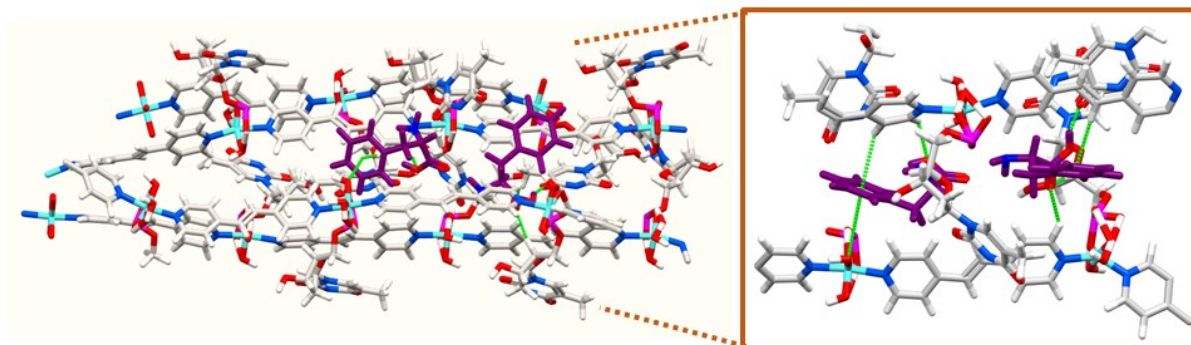

**Figure S4:** Molecular simulation-based CP-1 and *D/L*-amino acids interaction. (a) Interaction of CP-1 with *D*-Phenylalanine. (b) Interaction of CP-1 with *L*-Phenylalanine.



## 6.2. Molecular Simulation-based Interactions of CP-1 with *D*-Histidine and *L*-Histidine.

### a) Interaction of CP-1 with *D*-Histidine

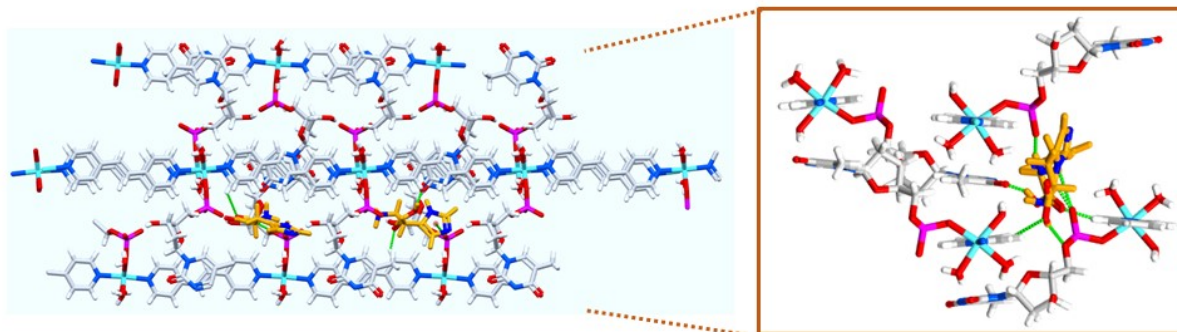

### b) Interaction of CP-1 with *L*-Histidine

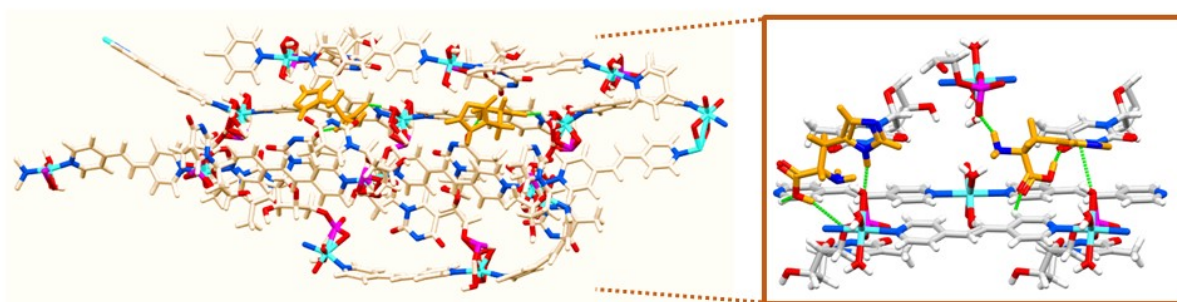

**Figure S5:** Molecular simulation-based CP-1 and *D/L*-amino acid interactions (a) Interaction of CP-1 with *D*-Histidine. (b) Interaction of CP-1 with *L*-Histidine.

### 6.3. The solution CD spectrum of CP-1 with Amino acids.

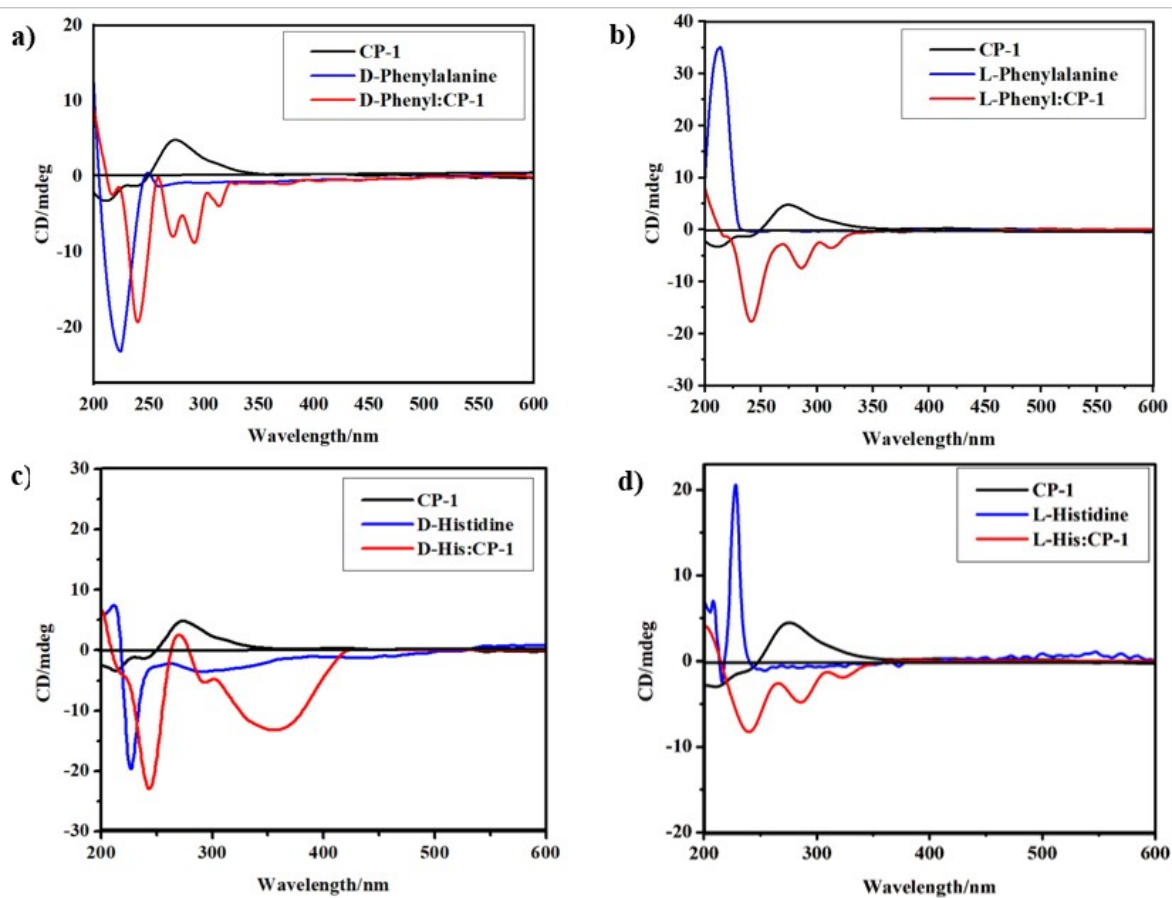

**Figure S6:** The solution CD spectrum of CP-1 ( $2.5 \times 10^{-5}$  M; distilled water) with amino acids ( $2.5 \times 10^{-5}$  M; distilled water). (a) CD results of *D*-Phenylalanine. (b) CD results of *L*-Phenylalanine. (c) CD results of *D*-Histidine. (d) CD results of *L*-Histidine.

### 7. The PXRD patterns of the CP-1.

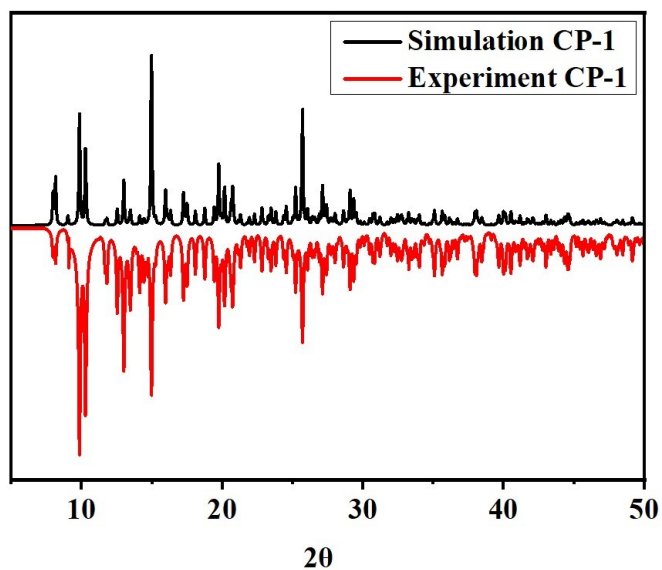

**Figure S7:** PXRD patterns compare the experimental and calculated values for CP-1.

### 8. The UV-Vis absorption spectrums of the ligand and CP-1.

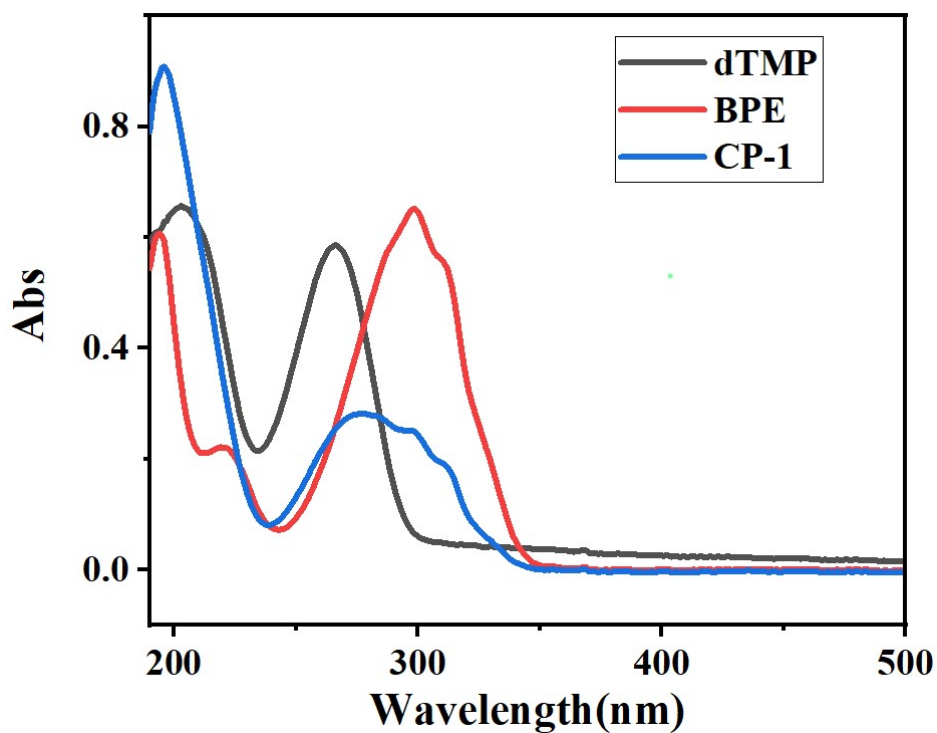

**Figure S8:** The solution-state UV-Vis absorption spectrum of dTMP.2Na, bpe, and CP-1 in aqueous solution at room temperature. The solution spectra were obtained by measuring  $2.5 \times 10^{-5}$  M solution in a 1 cm cell.

9. The CD spectra (Solid phase) of the ligand and CP-1.

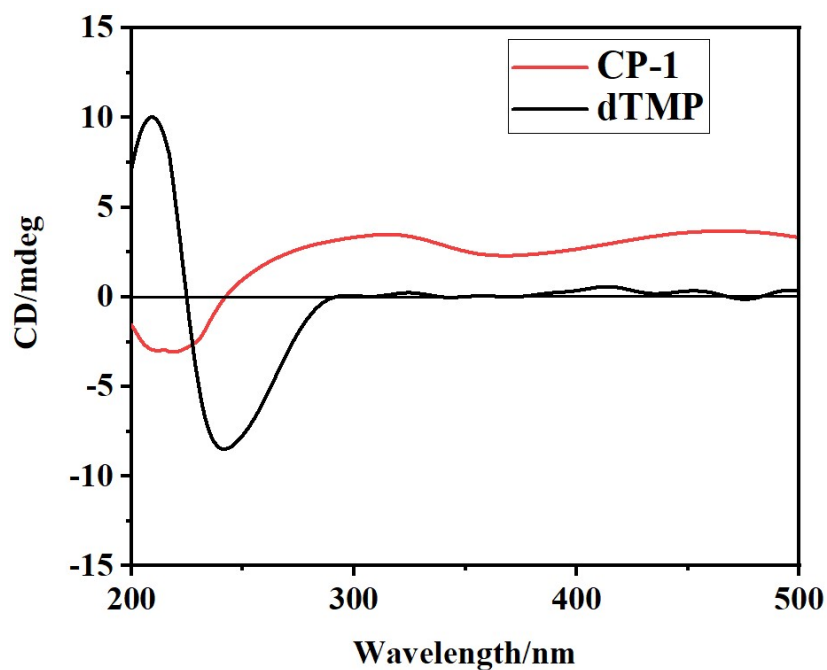

**Figure S9:** The solid-state CD spectrum of dTMP.2Na and its CP-1 measured in solid-state at room temperature. (KBr:[sample] = 200:1).

10. The CD spectra (Solution phase) of the ligand and CP-1.

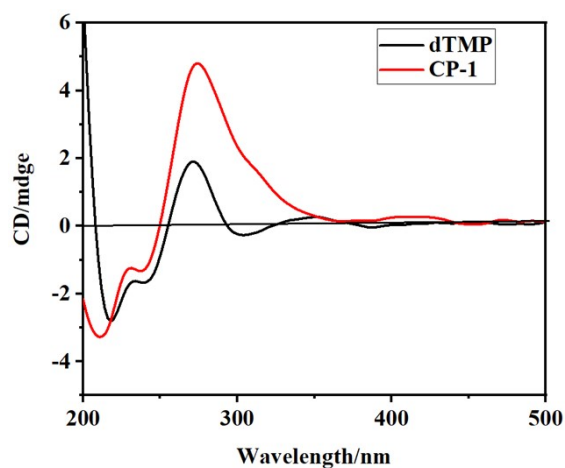

**Figure S10:** CD-spectra of dTMP.2Na and CP-1 in aqueous solution at room temperature; the solution spectra were obtained by measuring  $2.5 \times 10^{-5}$  M solution in a 1 cm cell.

## 11. Infrared Spectra.

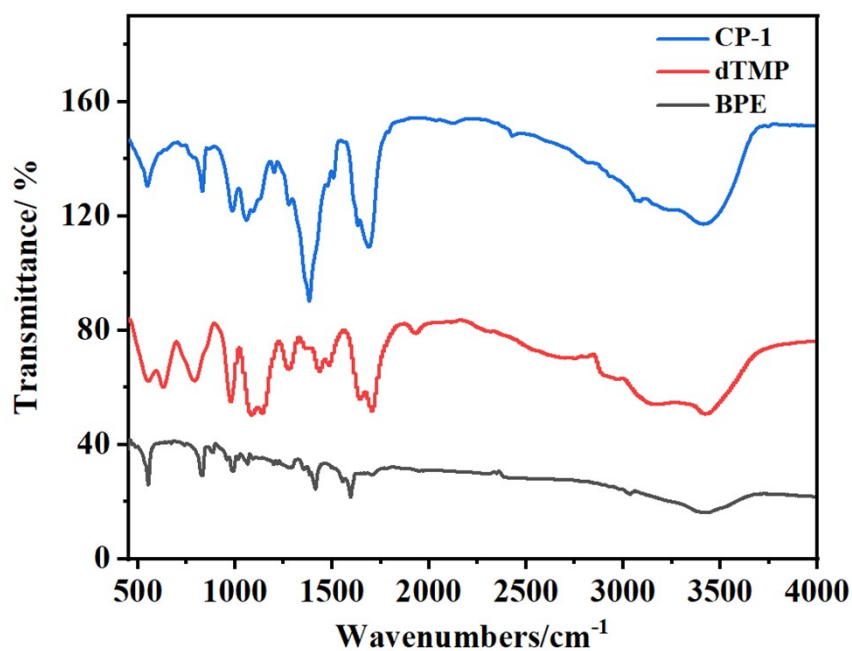

**Figure S11:** IR spectra of dTMP, bpe, CP-1. The infrared spectrum of the CP-1 includes not only the characteristic band of the dTMP.2Na ligand but also the characteristic band of the corresponding auxiliary ligand. Therefore, we infer that the CP-1 is a ternary complex.

## 12. Thermo-Gravimetric Analysis.

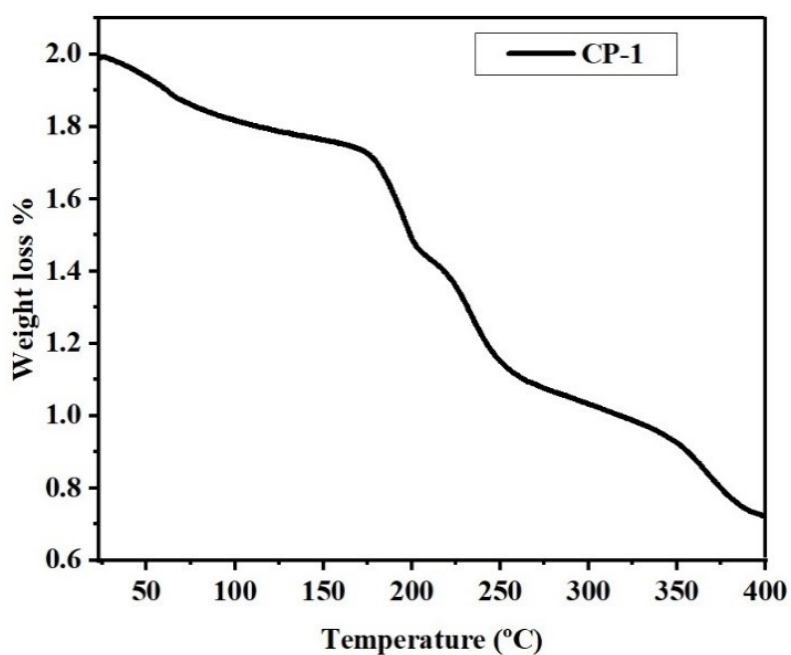

**Figure S12:** TG curves of CP-1.

### 13. The CD spectrum and UV-Vis titration of CP-1 with amino acids.

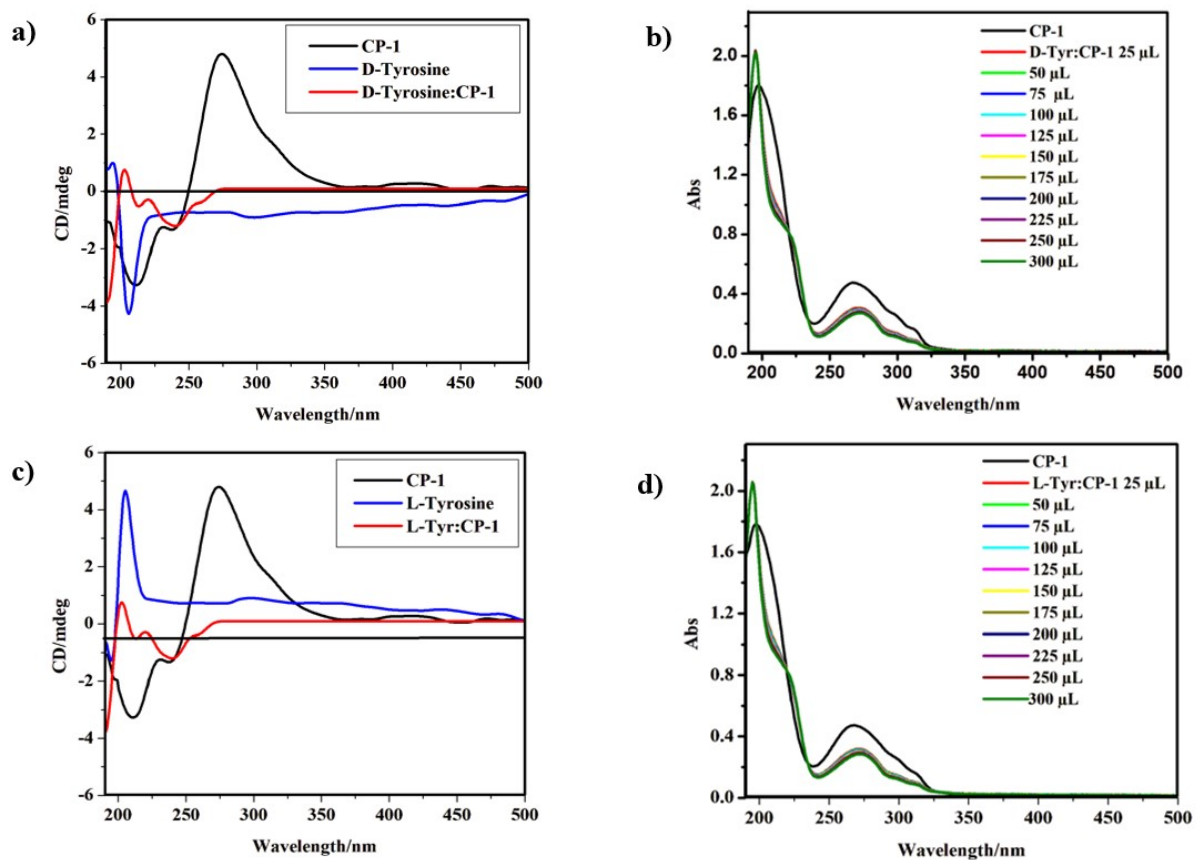

**Figure S13:** The solution CD spectrum and UV-visible titration of CP-1 ( $2.5 \times 10^{-5}$  M; distilled water) with varying concentrations (25  $\mu$ L-300  $\mu$ L) of amino acids ( $2.5 \times 10^{-5}$  M; distilled water). (a) CD results of *D*-Tyrosine. (b) Absorption spectra of *D*-Tyrosine. (c) CD results of *L*-Tyrosine. (d) Absorption spectra of *L*-Tyrosine.

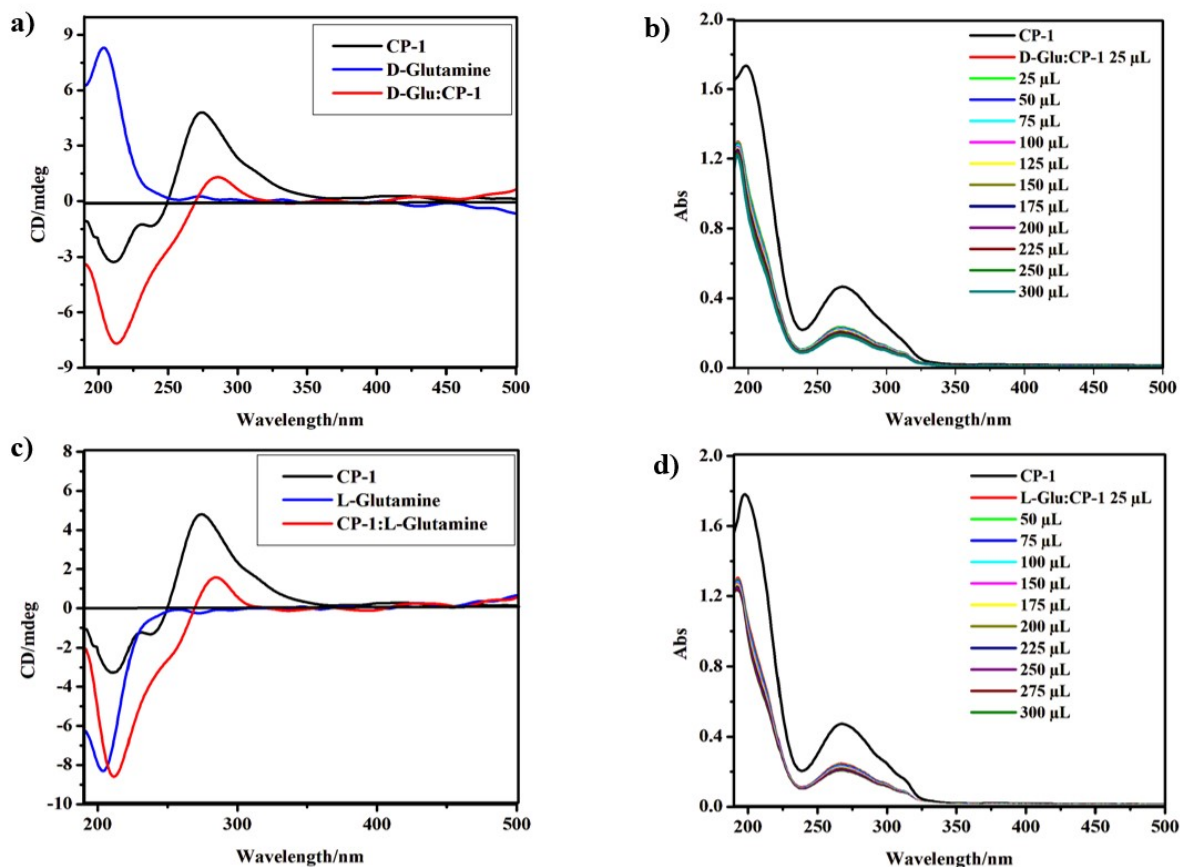

**Figure S14:** The solution CD spectrum and UV-visible titration of CP-1 ( $2.5 \times 10^{-5}$  M; distilled water) with varying concentrations (25  $\mu$ L-300  $\mu$ L) of amino acids ( $2.5 \times 10^{-5}$  M; distilled water). (a) CD results of *D*-Glutamine. (b) Absorption spectra of *D*-Glutamine. (c) CD results of *L*-Glutamine. (d) Absorption spectra of *L*-Glutamine.

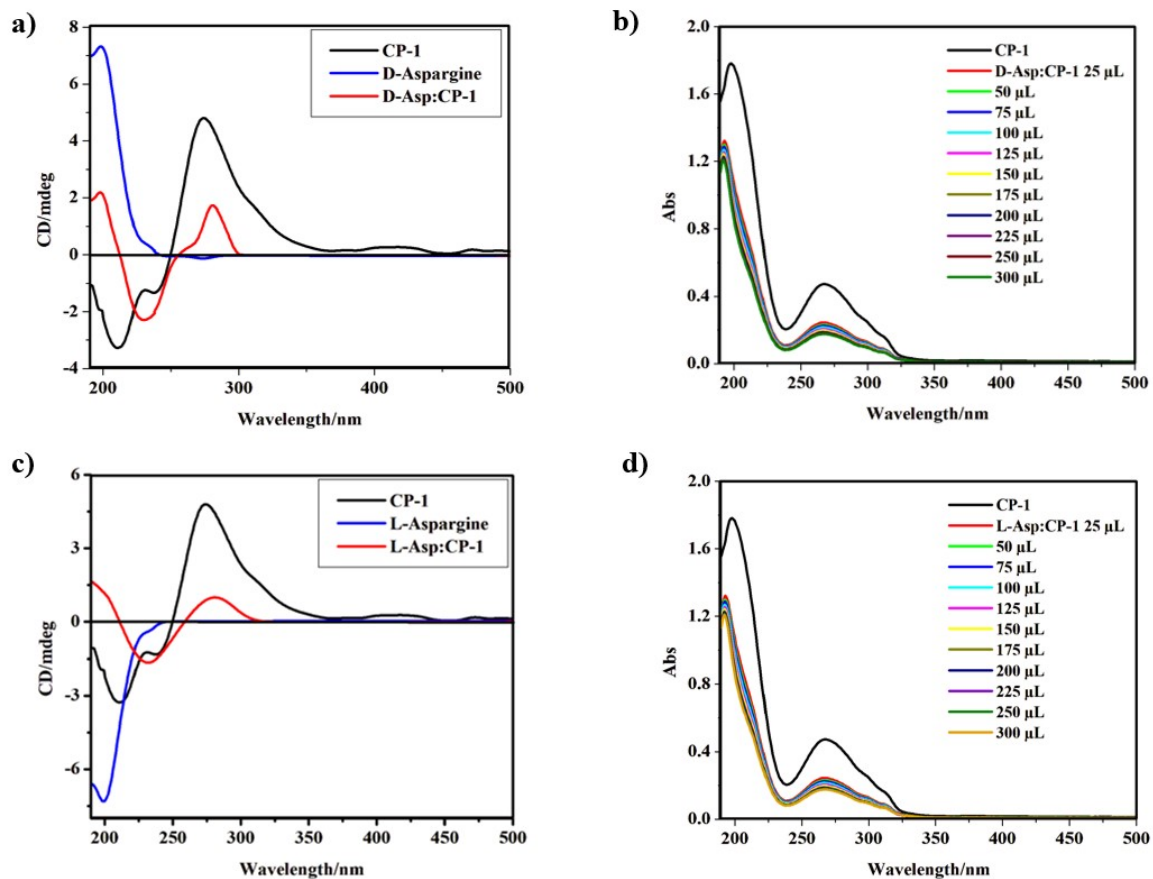

**Figure S15:** The solution CD spectrum and UV-visible titration of CP-1 ( $2.5 \times 10^{-5}$  M; distilled water) with varying concentrations (25  $\mu$ L-300  $\mu$ L) of amino acids ( $2.5 \times 10^{-5}$  M; distilled water). (a) CD results of *D*-Aspargine. (b) Absorption spectra of *D*-Aspargine. (c) CD results of *L*-Aspargine. (d) Absorption spectra of *L*-Aspargine.
